# Supplementary material for: Real-life use of delamanid: results from the European post-authorisation safety study
Source: PubMed Central journal article supplement (PMC11249655; doi:10.5588/ijtldopen.24.0113), 2024-06-01
Supplement: ijtld_open_june_0113_suppl_data.pdf [file ijtld_open_june_0113_suppl_data.pdf]

## Real-life use of delamanid: results from the European post-authorisation safety study

| <b>Supplementary Table S1. Treatment Emergent Adverse Events That Occurred in More Than 3% of Participants (Enrolled Set)</b> |                     |                                                   |                            |                   |                    |                                 |
|-------------------------------------------------------------------------------------------------------------------------------|---------------------|---------------------------------------------------|----------------------------|-------------------|--------------------|---------------------------------|
| <b>System Organ Class/<br/>MedDRA Preferred Term</b>                                                                          | <b>Incidence(%)</b> | <b>Mean<br/>Frequency<br/>(Number of<br/>AEs)</b> | <b>DLM<br/>Related (%)</b> | <b>Severe (%)</b> | <b>Serious (%)</b> | <b>Discontinued<br/>DLM (%)</b> |
| <b>Blood and Lymphatic System Disorders</b>                                                                                   |                     |                                                   |                            |                   |                    |                                 |
| Anaemia                                                                                                                       | 10 (11.6 %)         | 14.0 % (12)                                       | 0 (0.0 %)                  | 0 (0.0 %)         | 0 (0.0 %)          | 0 (0.0 %)                       |
| Neutropenia                                                                                                                   | 5 (5.8 %)           | 5.8 % (5)                                         | 1 (1.2 %)                  | 0 (0.0 %)         | 0 (0.0 %)          | 0 (0.0 %)                       |
| <b>Cardiac Disorders</b>                                                                                                      |                     |                                                   |                            |                   |                    |                                 |
| Palpitations                                                                                                                  | 3 (3.5 %)           | 3.5 % (3)                                         | 2 (2.3 %)                  | 0 (0.0 %)         | 0 (0.0 %)          | 0 (0.0 %)                       |
| <b>Ear and Labyrinth Disorders</b>                                                                                            |                     |                                                   |                            |                   |                    |                                 |
| Hypoacusis                                                                                                                    | 4 (4.7 %)           | 4.7 % (4)                                         | 0 (0.0 %)                  | 0 (0.0 %)         | 0 (0.0 %)          | 0 (0.0 %)                       |
| Tinnitus                                                                                                                      | 7 (8.1 %)           | 8.1 % (7)                                         | 1 (1.2 %)                  | 0 (0.0 %)         | 0 (0.0 %)          | 1 (1.2 %)                       |
| <b>Eye Disorders</b>                                                                                                          |                     |                                                   |                            |                   |                    |                                 |
| Optic Neuropathy                                                                                                              | 3 (3.5 %)           | 3.5 % (3)                                         | 1 (1.2 %)                  | 0 (0.0 %)         | 1 (1.2 %)          | 0 (0.0 %)                       |
| <b>Gastrointestinal Disorders</b>                                                                                             |                     |                                                   |                            |                   |                    |                                 |
| Abdominal Pain Upper                                                                                                          | 4 (4.7 %)           | 5.8 % (5)                                         | 0 (0.0 %)                  | 0 (0.0 %)         | 0 (0.0 %)          | 0 (0.0 %)                       |
| Diarrhoea                                                                                                                     | 7 (8.1 %)           | 9.3 % (8)                                         | 0 (0.0 %)                  | 0 (0.0 %)         | 0 (0.0 %)          | 0 (0.0 %)                       |
| Dyspepsia                                                                                                                     | 3 (3.5 %)           | 3.5 % (3)                                         | 0 (0.0 %)                  | 0 (0.0 %)         | 0 (0.0 %)          | 0 (0.0 %)                       |
| Nausea                                                                                                                        | 19 (22.1 %)         | 26.7 % (23)                                       | 6 (7.0 %)                  | 0 (0.0 %)         | 0 (0.0 %)          | 1 (1.2 %)                       |
| Vomiting                                                                                                                      | 10 (11.6 %)         | 20.9 % (18)                                       | 3 (3.5 %)                  | 0 (0.0 %)         | 0 (0.0 %)          | 0 (0.0 %)                       |
| <b>General Disorders and Administration Site<br/>Conditions</b>                                                               |                     |                                                   |                            |                   |                    |                                 |
| Asthenia                                                                                                                      | 5 (5.8 %)           | 7.0 % (6)                                         | 1 (1.2 %)                  | 0 (0.0 %)         | 0 (0.0 %)          | 0 (0.0 %)                       |
| <b>Infections and Infestations</b>                                                                                            |                     |                                                   |                            |                   |                    |                                 |
| Tuberculosis                                                                                                                  | 3 (3.5 %)           | 3.5 % (3)                                         | 0 (0.0 %)                  | 3 (3.5 %)         | 3 (3.5 %)          | 0 (0.0 %)                       |
| <b>Investigations</b>                                                                                                         |                     |                                                   |                            |                   |                    |                                 |
| Blood Uric Acid Increased                                                                                                     | 3 (3.5 %)           | 3.5 % (3)                                         | 0 (0.0 %)                  | 0 (0.0 %)         | 0 (0.0 %)          | 0 (0.0 %)                       |
| Electrocardiogram QT Prolonged                                                                                                | 10 (11.6 %)         | 11.6 % (10)                                       | 9 (10.5 %)                 | 0 (0.0 %)         | 0 (0.0 %)          | 1 (1.2 %)                       |
| <b>Metabolism and Nutrition Disorders</b>                                                                                     |                     |                                                   |                            |                   |                    |                                 |
| Decreased Appetite                                                                                                            | 6 (7.0 %)           | 7.0 % (6)                                         | 1 (1.2 %)                  | 0 (0.0 %)         | 0 (0.0 %)          | 0 (0.0 %)                       |
| Folate Deficiency                                                                                                             | 4 (4.7 %)           | 4.7 % (4)                                         | 0 (0.0 %)                  | 0 (0.0 %)         | 0 (0.0 %)          | 0 (0.0 %)                       |
| Hypokalaemia                                                                                                                  | 5 (5.8 %)           | 8.1 % (7)                                         | 2 (2.3 %)                  | 0 (0.0 %)         | 0 (0.0 %)          | 0 (0.0 %)                       |
| Vitamin D Deficiency                                                                                                          | 7 (8.1 %)           | 8.1 % (7)                                         | 0 (0.0 %)                  | 1 (1.2 %)         | 0 (0.0 %)          | 0 (0.0 %)                       |
| <b>Musculoskeletal and Connective Tissue<br/>Disorders</b>                                                                    |                     |                                                   |                            |                   |                    |                                 |
| Arthralgia                                                                                                                    | 8 (9.3 %)           | 9.3 % (8)                                         | 0 (0.0 %)                  | 0 (0.0 %)         | 0 (0.0 %)          | 0 (0.0 %)                       |
| <b>Nervous System Disorders</b>                                                                                               |                     |                                                   |                            |                   |                    |                                 |
| Epilepsy                                                                                                                      | 5 (5.8 %)           | 5.8 % (5)                                         | 0 (0.0 %)                  | 2 (2.3 %)         | 1 (1.2 %)          | 0 (0.0 %)                       |
| Headache                                                                                                                      | 4 (4.7 %)           | 4.7 % (4)                                         | 2 (2.3 %)                  | 0 (0.0 %)         | 0 (0.0 %)          | 0 (0.0 %)                       |
| Polyneuropathy                                                                                                                | 5 (5.8 %)           | 5.8 % (5)                                         | 0 (0.0 %)                  | 0 (0.0 %)         | 0 (0.0 %)          | 0 (0.0 %)                       |
| <b>Psychiatric Disorders</b>                                                                                                  |                     |                                                   |                            |                   |                    |                                 |
| Anxiety                                                                                                                       | 5 (5.8 %)           | 5.8 % (5)                                         | 1 (1.2 %)                  | 1 (1.2 %)         | 0 (0.0 %)          | 0 (0.0 %)                       |
| Borderline Personality Disorder                                                                                               | 3 (3.5 %)           | 3.5 % (3)                                         | 0 (0.0 %)                  | 0 (0.0 %)         | 0 (0.0 %)          | 0 (0.0 %)                       |
| Depression                                                                                                                    | 3 (3.5 %)           | 4.7 % (4)                                         | 1 (1.2 %)                  | 0 (0.0 %)         | 1 (1.2 %)          | 0 (0.0 %)                       |
| Insomnia                                                                                                                      | 9 (10.5 %)          | 10.5 % (9)                                        | 0 (0.0 %)                  | 0 (0.0 %)         | 0 (0.0 %)          | 0 (0.0 %)                       |
| <b>Renal and Urinary Disorders</b>                                                                                            |                     |                                                   |                            |                   |                    |                                 |

| <b>Supplementary Table S1. Treatment Emergent Adverse Events That Occurred in More Than 3% of Participants (Enrolled Set)</b> |                     |                                                   |                            |                   |                    |                                 |
|-------------------------------------------------------------------------------------------------------------------------------|---------------------|---------------------------------------------------|----------------------------|-------------------|--------------------|---------------------------------|
| <b>System Organ Class/<br/>MedDRA Preferred Term</b>                                                                          | <b>Incidence(%)</b> | <b>Mean<br/>Frequency<br/>(Number of<br/>AEs)</b> | <b>DLM<br/>Related (%)</b> | <b>Severe (%)</b> | <b>Serious (%)</b> | <b>Discontinued<br/>DLM (%)</b> |
| Acute Kidney Injury                                                                                                           | 3 ( 3.5 %)          | 3.5 % ( 3)                                        | 0 ( 0.0 %)                 | 0 ( 0.0 %)        | 1 ( 1.2 %)         | 0 ( 0.0 %)                      |
| Renal Failure                                                                                                                 | 7 ( 8.1 %)          | 10.5 % ( 9)                                       | 1 ( 1.2 %)                 | 0 ( 0.0 %)        | 1 ( 1.2 %)         | 0 ( 0.0 %)                      |
| <b>Respiratory, Thoracic and Mediastinal<br/>Disorders</b>                                                                    |                     |                                                   |                            |                   |                    |                                 |
| Chronic Obstructive Pulmonary Disease                                                                                         | 4 ( 4.7 %)          | 4.7 % ( 4)                                        | 0 ( 0.0 %)                 | 0 ( 0.0 %)        | 0 ( 0.0 %)         | 0 ( 0.0 %)                      |
| Cough                                                                                                                         | 4 ( 4.7 %)          | 4.7 % ( 4)                                        | 0 ( 0.0 %)                 | 0 ( 0.0 %)        | 0 ( 0.0 %)         | 0 ( 0.0 %)                      |
| Dyspnoea                                                                                                                      | 3 ( 3.5 %)          | 3.5 % ( 3)                                        | 0 ( 0.0 %)                 | 0 ( 0.0 %)        | 0 ( 0.0 %)         | 0 ( 0.0 %)                      |
| Haemoptysis                                                                                                                   | 4 ( 4.7 %)          | 4.7 % ( 4)                                        | 0 ( 0.0 %)                 | 0 ( 0.0 %)        | 1 ( 1.2 %)         | 0 ( 0.0 %)                      |
| <b>Skin and Subcutaneous Tissue Disorders</b>                                                                                 |                     |                                                   |                            |                   |                    |                                 |
| Acne                                                                                                                          | 4 ( 4.7 %)          | 4.7 % ( 4)                                        | 1 ( 1.2 %)                 | 0 ( 0.0 %)        | 0 ( 0.0 %)         | 0 ( 0.0 %)                      |
| Dermatitis Allergic                                                                                                           | 5 ( 5.8 %)          | 5.8 % ( 5)                                        | 0 ( 0.0 %)                 | 0 ( 0.0 %)        | 0 ( 0.0 %)         | 0 ( 0.0 %)                      |
| Pruritus                                                                                                                      | 5 ( 5.8 %)          | 5.8 % ( 5)                                        | 2 ( 2.3 %)                 | 0 ( 0.0 %)        | 0 ( 0.0 %)         | 0 ( 0.0 %)                      |
| <b>Vascular Disorders</b>                                                                                                     |                     |                                                   |                            |                   |                    |                                 |
| Hypertension                                                                                                                  | 4 ( 4.7 %)          | 4.7 % ( 4)                                        | 0 ( 0.0 %)                 | 0 ( 0.0 %)        | 0 ( 0.0 %)         | 0 ( 0.0 %)                      |

DLM: Delamanid

Subjects are counted once, per SOC, for the most severe of multiple occurrences of a specific system organ class. The total number of enrolled participants (86) has been used as the denominator for all percentages.

**Supplementary Table S2. Treatment Emergent Adverse Events of Special Interest (Enrolled Set)**

| <b>System Organ Class/<br/>MedDRA Preferred Term</b> | <b>Incidence(%)</b> | <b>DLM<br/>Related (%)</b> | <b>Severe (%)</b> | <b>Serious (%)</b> | <b>Discontinued<br/>DLM (%)</b> |
|------------------------------------------------------|---------------------|----------------------------|-------------------|--------------------|---------------------------------|
| <b>Cardiac Disorders</b>                             |                     |                            |                   |                    |                                 |
| Myocardial Infarction                                | 1 ( 1.2 %)          | 0 ( 0.0 %)                 | 1 ( 1.2 %)        | 1 ( 1.2 %)         | 0 ( 0.0 %)                      |
| Palpitations                                         | 3 ( 3.5 %)          | 2 ( 2.3 %)                 | 0 ( 0.0 %)        | 0 ( 0.0 %)         | 0 ( 0.0 %)                      |
| Tachycardia                                          | 2 ( 2.3 %)          | 0 ( 0.0 %)                 | 0 ( 0.0 %)        | 0 ( 0.0 %)         | 0 ( 0.0 %)                      |
| Wolff-Parkinson-White Syndrome                       | 1 ( 1.2 %)          | 0 ( 0.0 %)                 | 0 ( 0.0 %)        | 0 ( 0.0 %)         | 0 ( 0.0 %)                      |
| <b>Hepatobiliary Disorders</b>                       |                     |                            |                   |                    |                                 |
| Hepatic Cytolysis                                    | 1 ( 1.2 %)          | 1 ( 1.2 %)                 | 1 ( 1.2 %)        | 1 ( 1.2 %)         | 1 ( 1.2 %)                      |
| Hepatitis                                            | 1 ( 1.2 %)          | 0 ( 0.0 %)                 | 1 ( 1.2 %)        | 1 ( 1.2 %)         | 0 ( 0.0 %)                      |
| Hepatitis Acute                                      | 1 ( 1.2 %)          | 1 ( 1.2 %)                 | 0 ( 0.0 %)        | 1 ( 1.2 %)         | 0 ( 0.0 %)                      |
| Hepatitis Toxic                                      | 2 ( 2.3 %)          | 0 ( 0.0 %)                 | 1 ( 1.2 %)        | 1 ( 1.2 %)         | 0 ( 0.0 %)                      |
| <b>Investigations</b>                                |                     |                            |                   |                    |                                 |
| Alanine Aminotransferase Increased                   | 1 ( 1.2 %)          | 0 ( 0.0 %)                 | 1 ( 1.2 %)        | 0 ( 0.0 %)         | 0 ( 0.0 %)                      |
| Aspartate Aminotransferase Increased                 | 1 ( 1.2 %)          | 0 ( 0.0 %)                 | 1 ( 1.2 %)        | 0 ( 0.0 %)         | 0 ( 0.0 %)                      |
| Blood Bilirubin Increased                            | 1 ( 1.2 %)          | 0 ( 0.0 %)                 | 0 ( 0.0 %)        | 0 ( 0.0 %)         | 0 ( 0.0 %)                      |
| Electrocardiogram QT Prolonged                       | 10 (11.6 %)         | 9 (10.5 %)                 | 0 ( 0.0 %)        | 0 ( 0.0 %)         | 1 ( 1.2 %)                      |
| Transaminases Increased                              | 1 ( 1.2 %)          | 0 ( 0.0 %)                 | 0 ( 0.0 %)        | 0 ( 0.0 %)         | 0 ( 0.0 %)                      |
| <b>Psychiatric Disorders</b>                         |                     |                            |                   |                    |                                 |
| Adjustment Disorder                                  | 1 ( 1.2 %)          | 0 ( 0.0 %)                 | 0 ( 0.0 %)        | 0 ( 0.0 %)         | 0 ( 0.0 %)                      |
| Alcohol Abuse                                        | 1 ( 1.2 %)          | 0 ( 0.0 %)                 | 1 ( 1.2 %)        | 0 ( 0.0 %)         | 0 ( 0.0 %)                      |
| Alcohol Withdrawal Syndrome                          | 1 ( 1.2 %)          | 0 ( 0.0 %)                 | 0 ( 0.0 %)        | 0 ( 0.0 %)         | 0 ( 0.0 %)                      |
| Anxiety                                              | 5 ( 5.8 %)          | 1 ( 1.2 %)                 | 1 ( 1.2 %)        | 0 ( 0.0 %)         | 0 ( 0.0 %)                      |
| Anxiety Disorder                                     | 1 ( 1.2 %)          | 0 ( 0.0 %)                 | 0 ( 0.0 %)        | 0 ( 0.0 %)         | 0 ( 0.0 %)                      |
| Borderline Personality Disorder                      | 3 ( 3.5 %)          | 0 ( 0.0 %)                 | 0 ( 0.0 %)        | 0 ( 0.0 %)         | 0 ( 0.0 %)                      |
| Depression                                           | 3 ( 3.5 %)          | 1 ( 1.2 %)                 | 0 ( 0.0 %)        | 1 ( 1.2 %)         | 0 ( 0.0 %)                      |
| Generalised Anxiety Disorder                         | 1 ( 1.2 %)          | 0 ( 0.0 %)                 | 0 ( 0.0 %)        | 0 ( 0.0 %)         | 0 ( 0.0 %)                      |
| Hallucination                                        | 1 ( 1.2 %)          | 0 ( 0.0 %)                 | 0 ( 0.0 %)        | 0 ( 0.0 %)         | 0 ( 0.0 %)                      |
| Insomnia                                             | 9 (10.5 %)          | 0 ( 0.0 %)                 | 0 ( 0.0 %)        | 0 ( 0.0 %)         | 0 ( 0.0 %)                      |
| Panic Reaction                                       | 1 ( 1.2 %)          | 0 ( 0.0 %)                 | 1 ( 1.2 %)        | 0 ( 0.0 %)         | 0 ( 0.0 %)                      |
| Personality Disorder                                 | 1 ( 1.2 %)          | 0 ( 0.0 %)                 | 0 ( 0.0 %)        | 0 ( 0.0 %)         | 0 ( 0.0 %)                      |
| Schizophrenia                                        | 1 ( 1.2 %)          | 0 ( 0.0 %)                 | 1 ( 1.2 %)        | 0 ( 0.0 %)         | 0 ( 0.0 %)                      |
| Sleep Disorder                                       | 2 ( 2.3 %)          | 0 ( 0.0 %)                 | 0 ( 0.0 %)        | 0 ( 0.0 %)         | 0 ( 0.0 %)                      |
| Somatic Symptom Disorder                             | 1 ( 1.2 %)          | 0 ( 0.0 %)                 | 0 ( 0.0 %)        | 0 ( 0.0 %)         | 0 ( 0.0 %)                      |

DLM: Delamanid

subjects are counted once, per SOC, for the most severe of multiple occurrences of a specific system organ class. The total number of enrolled participants (86) has been used as the denominator for all percentages.
